# Supplementary material
Source: PubMed Central journal article supplement (PMC4325675)
Supplement: supp_dev005_dev005suppl_table2.pdf [file supp_dev005_dev005suppl_table2.pdf]

:

**Supplementary Table SII** MicroRNA-451, macrophage migration inhibitory factor (MIF) mRNA and MIF protein expression analyzed by stage of endometriosis.<sup>1</sup>

| Group                                      | Number of points | Median | Minimum | Maximum |
|--------------------------------------------|------------------|--------|---------|---------|
| <i>miR451</i> expression ( $P = 0.719$ )   |                  |        |         |         |
| Stage I/II endometriosis                   | 8                | 1.860  | 0.070   | 10.630  |
| Stage III/IV endometriosis                 | 35               | 1.830  | 0.010   | 250.10  |
| <i>MIF</i> mRNA expression ( $P = 0.999$ ) |                  |        |         |         |
| Stage I/II endometriosis                   | 8                | 0.275  | 0.010   | 0.750   |
| Stage III/IV endometriosis                 | 35               | 0.260  | 0.120   | 5.720   |
| MIF protein expression ( $P = 0.839$ )     |                  |        |         |         |
| Stage I/II endometriosis                   | 8                | 0.275  | 0.010   | 1.820   |
| Stage III/IV endometriosis                 | 32               | 0.470  | 0.005   | 2.420   |

Data are expressed as the ratio ectopic/eutopic.

<sup>1</sup>Data were not normally distributed and were therefore analyzed for each end-point using the non-parametric Mann–Whitney test.
